# Supplementary material
Source: PubMed Central journal article supplement (PMC8579376)
Supplement: NIHMS1739837-supplement-1.pdf [file NIHMS1739837-supplement-1.pdf]

## Supplementary Methods

*Removal of Non-brain Tissues:* The skull is removed using an atlas-based method (Aljabar et al., 2009), followed by human quality control so only minor cleanup is required, if so. Structural MRI brain images are then nonlinearly registered by cubic B-spline deformation (Rueckert et al., 2006) to a minimal deformation template (Kochunov et al., 2001) adapted for age 60 and above.

*Image Intensity Inhomogeneity Correction:* ADNI utilizes a template-based iterative method for correcting field inhomogeneity bias (Fletcher et al., 2012a). At each algorithm iteration, the update of a B-spline deformation between an unbiased template and the subject image is interleaved with estimation of a bias field based on the current template-to-image alignment. The bias field is modeled using a spatially smooth thin-plate spline interpolation based on ratios of local image patch intensity means between the deformed template and subject images. This is used to iteratively correct subject image intensities which are then used to improve the template-to-image deformation.

*Gray and White Matter Measurement:* The segmentation algorithm is based on an Expectation-Maximization (EM) algorithm that iteratively refines its segmentation estimates to produce outputs that are most consistent with the input intensities from the native-space T1 images along with a model of image smoothness (Fletcher et al., 2012b; Rajapakse et al., 1996). Like all EM algorithms, the system must be initialized with a reasonable estimate. This initial estimate is produced from the template-space warps of previously segmented images; because locations of WM/GM tissues are known in the template space, transforming these masks back to each image's native space produces rough estimate 3-tissue segmentations. The mean and standard deviation of the image intensities is then calculated in locations labeled as each tissue type. These values then form the initial parameters for a Gaussian model of image intensity for each class. At each iteration,

the algorithm uses a Gaussian model of T1-weighted image intensity for each tissue class, in order to produce a segmentation. In the first iteration, these models are estimated as described above. The segmentation yielded by these appearance models alone is then refined using a Markov Random Field (MRF) model, which produces a label map consistent with both the input intensities and image smoothness statistics. Inference in the MRF is computed using an adaptive priors model (Fletcher et al., 2012b). This refined segmentation from the MRF is then used to compute new Gaussian intensity models for each tissue class, and the algorithm repeats, iteratively switching between calculating Gaussian appearance models and MRF-based segmentation, until convergence.

*Automatic Hippocampal Segmentation:* The IDeA lab employs a standard atlas based diffeomorphic approach (Vercauteren et al., 2007) with the minor modification of label refinement. This approach was further modified to include the EADC-ADNI harmonized hippocampal masks to assure standardization across cohorts. Therefore, the following approach was adapted: 1) Subject image pre-processing with extraction of intracranial cavity, non-uniformity correction, tissue classification as discussed above; 2) Atlas Registration of all EADC-ADNI hippocampal masks (Boccardi et al., 2015a; Boccardi et al., 2015b; Bocchetta et al., 2015; Frisoni et al., 2013; Frisoni and Jack, 2015) to each subject; 3) Atlas Fusion utilizing MALF (Wang and Yushkevich, 2012; Wang et al., 2015); and 4) Intensity-based label refinement.

*ROI-based Analysis:* Software developed by the IDeA laboratory allows the creation of any set of user-defined ROIs or utilization of published ROIs. The lab provides multiple sets of predefined regions of interest including lobar volumes, the Desikan-Killiany Atlas from Freesurfer (Desikan et al., 2006) and Brodmann areas defined by an expert anatomist (Lee et al., 2010). Regional measures are calculated by back transformation of the atlas into segmented image native

space. A voting scheme is used to assure precise labelling of each region after interpolation of the atlas into native space.

### **Supplementary References**

Aljabar, P., Heckemann, R.A., Hammers, A., Hajnal, J.V., Rueckert, D., 2009. Multi-atlas based segmentation of brain images: atlas selection and its effect on accuracy. *Neuroimage* 46, 726-738.

Boccardi, M., Bocchetta, M., Apostolova, L.G., Barnes, J., Bartzokis, G., Corbetta, G., DeCarli, C., deToledo-Morrell, L., Firbank, M., Ganzola, R., Gerritsen, L., Henneman, W., Killiany, R.J., Malykhin, N., Pasqualetti, P., Pruessner, J.C., Redolfi, A., Robitaille, N., Soininen, H., Tolomeo, D., Wang, L., Watson, C., Wolf, H., Duvernoy, H., Duchesne, S., Jack, C.R., Jr., Frisoni, G.B., 2015a. Delphi definition of the EADC-ADNI Harmonized Protocol for hippocampal segmentation on magnetic resonance. *Alzheimers Dement* 11, 126-138.

Boccardi, M., Bocchetta, M., Ganzola, R., Robitaille, N., Redolfi, A., Duchesne, S., Jack, C.R., Frisoni, G.B., Bartzokis, G., Csernansky, J.G., de Leon, M.J., deToledo-Morrell, L., Killiany, R.J., Lehericy, S., Malykhin, N., Pantel, J., Pruessner, J.C., Soininen, H., Watson, C., 2015b. Operationalizing protocol differences for EADC-ADNI manual hippocampal segmentation. *Alzheimer's & Dementia* 11, 184-194.

Bocchetta, M., Boccardi, M., Ganzola, R., Apostolova, L.G., Preboske, G., Wolf, D., Ferrari, C., Pasqualetti, P., Robitaille, N., Duchesne, S., Jack, C.R., Jr., Frisoni, G.B., 2015. Harmonized benchmark labels of the hippocampus on magnetic resonance: the EADC-ADNI project. *Alzheimers Dement* 11, 151-160.e155.

Desikan, R.S., Ségonne, F., Fischl, B., Quinn, B.T., Dickerson, B.C., Blacker, D., Buckner, R.L., Dale, A.M., Maguire, R.P., Hyman, B.T., Albert, M.S., Killiany, R.J., 2006. An automated

labeling system for subdividing the human cerebral cortex on MRI scans into gyral based regions of interest. *Neuroimage* 31, 968-980.

Fletcher, E., Carmichael, O., Decarli, C., 2012a. MRI non-uniformity correction through interleaved bias estimation and B-spline deformation with a template. *Annu Int Conf IEEE Eng Med Biol Soc* 2012, 106-109.

Fletcher, E., Singh, B., Harvey, D., Carmichael, O., DeCarli, C., 2012b. Adaptive image segmentation for robust measurement of longitudinal brain tissue change. *Annu Int Conf IEEE Eng Med Biol Soc* 2012, 5319-5322.

Frisoni, G.B., Bocchetta, M., Chételat, G., Rabinovici, G.D., de Leon, M.J., Kaye, J., Reiman, E.M., Scheltens, P., Barkhof, F., Black, S.E., Brooks, D.J., Carrillo, M.C., Fox, N.C., Herholz, K., Nordberg, A., Jack, C.R., Jr., Jagust, W.J., Johnson, K.A., Rowe, C.C., Sperling, R.A., Thies, W., Wahlund, L.O., Weiner, M.W., Pasqualetti, P., Decarli, C., 2013. Imaging markers for Alzheimer disease: which vs how. *Neurology* 81, 487-500.

Frisoni, G.B., Jack, C.R., 2015. HarP: the EADC-ADNI Harmonized Protocol for manual hippocampal segmentation. A standard of reference from a global working group. *Alzheimers Dement* 11, 107-110.

Kochunov, P., Lancaster, J.L., Thompson, P., Woods, R., Mazziotta, J., Hardies, J., Fox, P., 2001. Regional spatial normalization: toward an optimal target. *J Comput Assist Tomogr* 25, 805-816.

Lee, J., Im, S.J., Lee, S.G., Stadlin, A., Son, J.W., Shin, C.J., Ju, G., Lee, S.I., Kim, S., 2016. Volume of hippocampal subfields in patients with alcohol dependence. *Psychiatry Res Neuroimaging* 258, 16-22.

Rajapakse, J.C., Giedd, J.N., DeCarli, C., Snell, J.W., McLaughlin, A., Vauss, Y.C., Krain, A.L., Hamburger, S., Rapoport, J.L., 1996. A technique for single-channel MR brain tissue segmentation: application to a pediatric sample. *Magn Reson Imaging* 14, 1053-1065.

Rueckert, D., Aljabar, P., Heckemann, R.A., Hajnal, J.V., Hammers, A., 2006. Diffeomorphic registration using B-splines. *Med Image Comput Comput Assist Interv* 9, 702-709.

Vercauteren, T., Pennec, X., Perchant, A., Ayache, N., 2007. *Non-parametric Diffeomorphic Image Registration with the Demons Algorithm*. Springer Berlin Heidelberg, Berlin, Heidelberg, pp. 319-326.

Wang, H., Yushkevich, P.A., 2012. DEPENDENCY PRIOR FOR MULTI-ATLAS LABEL FUSION. *Proc IEEE Int Symp Biomed Imaging* 2012, 892-895.

Wang, W.Y., Yu, J.T., Liu, Y., Yin, R.H., Wang, H.F., Wang, J., Tan, L., Radua, J., Tan, L., 2015. Voxel-based meta-analysis of grey matter changes in Alzheimer's disease. *Transl Neurodegener* 4, 6.

**Supplementary Table S1:** Principal components of the 64 regional GMVs

| <b>Component</b>      | <b>Component name</b>                  | <b>Component</b>          | <b>Cumulative %</b> | <b>Loading</b> |
|-----------------------|----------------------------------------|---------------------------|---------------------|----------------|
| 1                     | Somatomotor<br>complex                 | Precentral (L)            | 44.3%               | 0.830          |
|                       |                                        | Paracentral (L)           |                     | 0.793          |
|                       |                                        | Precentral (R)            |                     | 0.784          |
|                       |                                        | Paracentral (R)           |                     | 0.731          |
|                       |                                        | Postcentral (L)           |                     | 0.706          |
|                       |                                        | Postcentral (R)           |                     | 0.583          |
|                       |                                        | Superior frontal (L)      |                     | 0.554          |
|                       |                                        | Caudal middle frontal (L) |                     | 0.542          |
|                       |                                        | Caudal middle frontal (R) |                     | 0.523          |
|                       |                                        | Superior frontal (R)      |                     | 0.498          |
|                       |                                        | Posterior cingulate (L)   |                     | 0.443          |
| 2                     | Inferior / superior<br>parietal cortex | Inferior parietal (R)     | 48.7%               | 0.831          |
|                       |                                        | Superior parietal (L)     |                     | 0.799          |
|                       |                                        | Inferior parietal (L)     |                     | 0.778          |
|                       |                                        | Supramarginal (L)         |                     | 0.714          |
|                       |                                        | Precuneus (L)             |                     | 0.700          |
|                       |                                        | Middle temporal (R)       |                     | 0.694          |
|                       |                                        | Supramarginal (R)         |                     | 0.669          |
|                       |                                        | Superior parietal (R)     |                     | 0.658          |
|                       |                                        | Precuneus (R)             |                     | 0.647          |
|                       |                                        | Middle temporal (L)       |                     | 0.593          |
|                       |                                        | Inferior temporal (R)     |                     | 0.430          |
| Inferior temporal (L) | 0.419                                  |                           |                     |                |
| 3                     | Hippocampal<br>complex                 | Hippocampus (L)           | 52.6%               | 1.071          |
|                       |                                        | Hippocampus (R)           |                     | 1.062          |
|                       |                                        | Entorhinal (L)            |                     | 0.827          |
|                       |                                        | Entorhinal (R)            |                     | 0.807          |
|                       |                                        | Parahippocampus (R)       |                     | 0.782          |
|                       |                                        | Parahippocampus (L)       |                     | 0.686          |
| 4                     | Occipital cortex                       | Pericalcarine (L)         | 55.9%               | 0.875          |
|                       |                                        | Pericalcarine (R)         |                     | 0.795          |

---

|   |                        |                                |       |       |
|---|------------------------|--------------------------------|-------|-------|
|   |                        | Lingual (L)                    |       | 0.789 |
|   |                        | Lingual (R)                    |       | 0.704 |
|   |                        | Lateral occipital (L)          |       | 0.670 |
|   |                        | Cuneus (L)                     |       | 0.655 |
|   |                        | Cuneus (R)                     |       | 0.644 |
|   |                        | Lateral occipital (R)          |       | 0.589 |
| 5 | Inferior frontal gyrus | Pars triangularis (R)          | 58.5% | 0.841 |
|   |                        | Pars triangularis (L)          |       | 0.838 |
|   |                        | Pars orbitalis (L)             |       | 0.816 |
|   |                        | Pars orbitalis (R)             |       | 0.620 |
|   |                        | Medial orbitofrontal (L)       |       | 0.543 |
|   |                        | Rostral middle frontal (R)     |       | 0.539 |
|   |                        | Rostral middle frontal (L)     |       | 0.530 |
|   |                        | Medial orbitofrontal (R)       |       | 0.502 |
|   |                        | Pars opercularis (R)           |       | 0.445 |
|   |                        | Lateral orbitofrontal (R)      |       | 0.439 |
| 6 | Anterior cingulate     | Caudal anterior cingulate (R)  | 60.8% | 0.799 |
|   |                        | Caudal anterior cingulate (L)  |       | 0.762 |
|   |                        | Rostral anterior cingulate (R) |       | 0.599 |
|   |                        | Rostral anterior cingulate (L) |       | 0.595 |
| 7 | Posterior cingulate    | Posterior cingulate (R)        | 62.6% | 0.862 |
|   |                        | Posterior cingulate (L)        |       | 0.853 |
|   |                        | Insula (R)                     |       | 0.416 |
|   |                        | Inferior temporal (L)          |       | 0.403 |
| 8 | Isthmus cingulate      | Isthmus cingulate (L)          | 64.3% | 0.743 |
|   |                        | Isthmus cingulate (R)          |       | 0.721 |
|   |                        | Transverse temporal (R)        |       | 0.573 |
|   |                        | Transverse temporal (L)        |       | 0.502 |

---

R = Right; L = Left
